# Supplementary material for: Quantitative proteomics of cerebrospinal fluid from African Americans and Caucasians reveals shared and divergent changes in Alzheimer’s disease
Source: PubMed Central journal article supplement (PMC10355042; doi:10.1186/s13024-023-00638-z), 2023-07-19

# Supplemental Figure 4

**A**

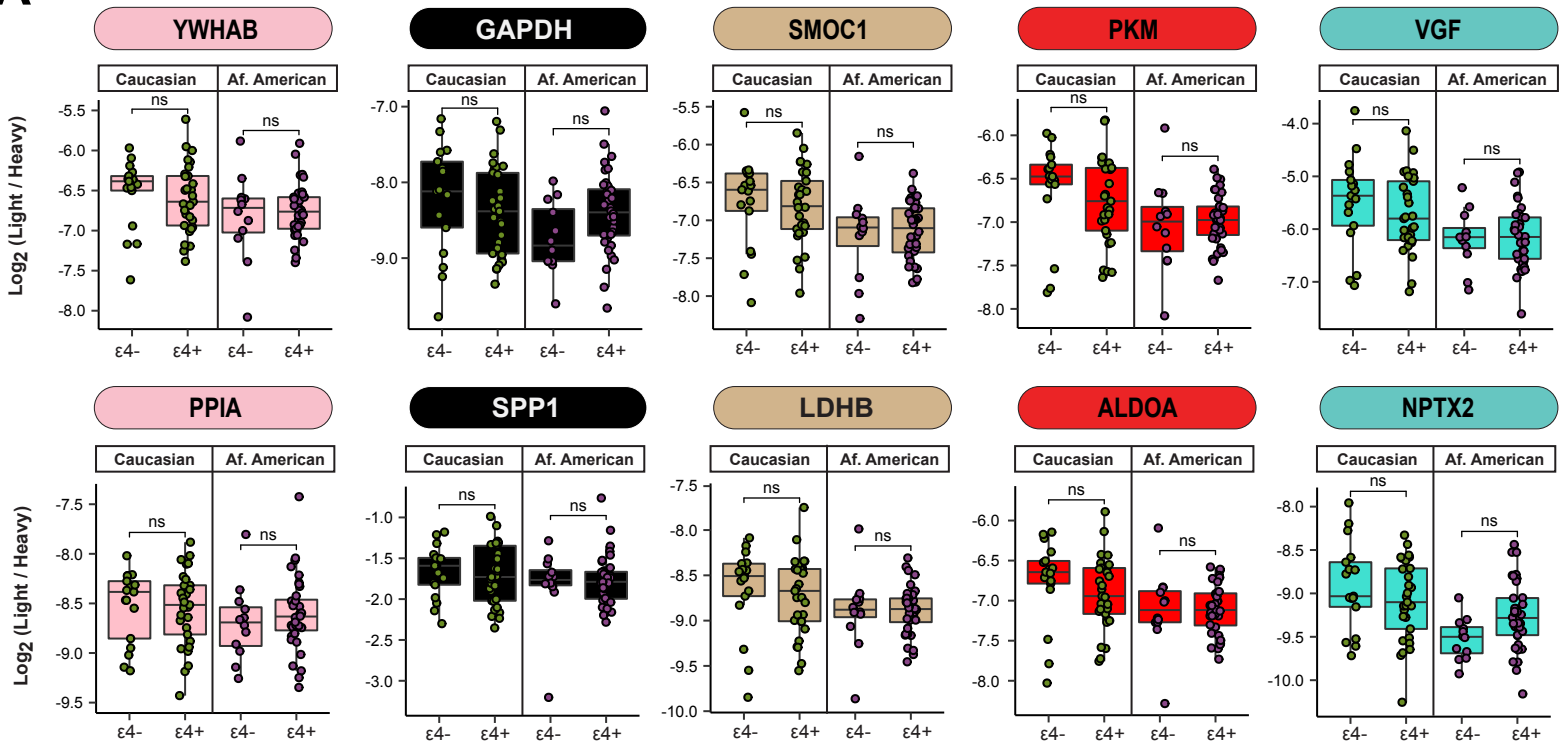

**B**

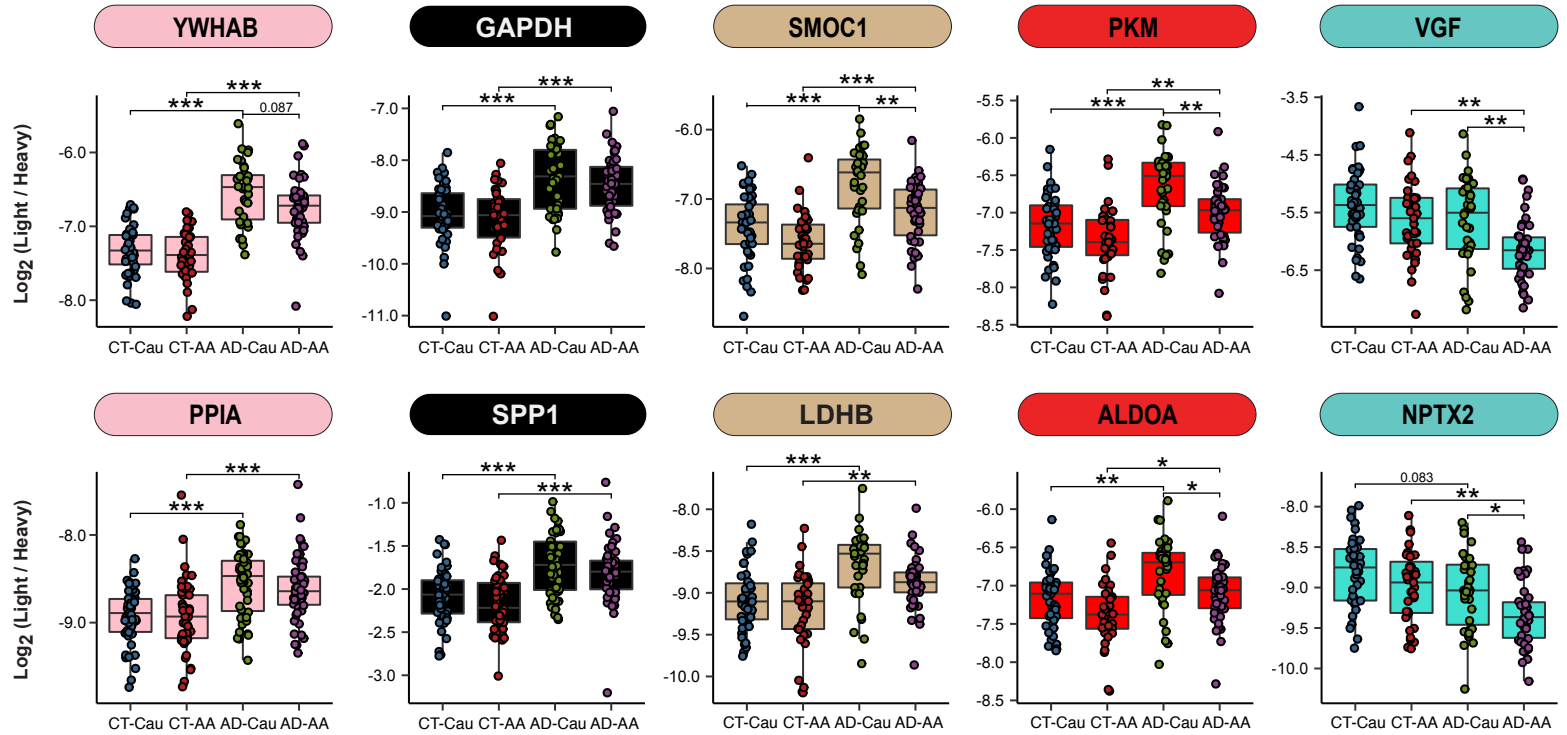

Supplement: 13024_2023_638_MOESM5_ESM.pdf [file 13024_2023_638_MOESM5_ESM.pdf]
